# Supplementary material for: Content Analysis of Official Public Health Communications in Ontario, Canada during the COVID-19 Pandemic
Source: MDPI journal article supplement (doi:10.3390/ijerph21030351), 2024-03-15
Supplement: s1 [file s1]

# Ontario Public Health Releases

## Codes

| Name          | Description | Files | References |
|---------------|-------------|-------|------------|
| Dates         |             | 322   | 645        |
| April 2020    |             | 30    | 30         |
| April 2021    |             | 16    | 16         |
| April 2022    |             | 1     | 1          |
| August 2020   |             | 7     | 7          |
| August 2021   |             | 3     | 3          |
| August 2022   |             | 2     | 2          |
| December 2020 |             | 14    | 14         |
| December 2021 |             | 8     | 8          |
| December 2022 |             | 2     | 2          |
| February 2020 |             | 6     | 6          |
| February 2021 |             | 9     | 9          |
| February 2022 |             | 3     | 3          |
| January 2020  |             | 2     | 2          |
| January 2021  |             | 11    | 11         |
| January 2022  |             | 3     | 3          |
| July 2020     |             | 13    | 13         |
| July 2021     |             | 3     | 3          |
| July 2022     |             | 2     | 2          |

| Name           | Description | Files | References |
|----------------|-------------|-------|------------|
| June 2020      |             | 26    | 26         |
| June 2021      |             | 12    | 12         |
| March 2020     |             | 32    | 32         |
| March 2021     |             | 20    | 20         |
| March 2022     |             | 1     | 1          |
| May 2020       |             | 22    | 22         |
| May 2021       |             | 12    | 12         |
| November 2020  |             | 15    | 15         |
| November 2021  |             | 5     | 5          |
| October 2020   |             | 10    | 10         |
| October 2021   |             | 7     | 7          |
| October 2022   |             | 1     | 1          |
| September 2020 |             | 17    | 17         |
| September 2021 |             | 5     | 5          |
| September 2022 |             | 2     | 2          |
| Week 10, 2020  |             | 6     | 6          |
| Week 10, 2021  |             | 2     | 2          |
| Week 11, 2020  |             | 4     | 4          |
| Week 11, 2021  |             | 4     | 4          |
| Week 11, 2022  |             | 1     | 1          |
| Week 12, 2020  |             | 10    | 10         |
| Week 12, 2021  |             | 4     | 4          |
| Week 13, 2020  |             | 8     | 8          |
| Week 13, 2021  |             | 4     | 4          |
| Week 14, 2020  |             | 8     | 8          |

| Name          | Description | Files | References |
|---------------|-------------|-------|------------|
| Week 14, 2021 |             | 7     | 7          |
| Week 15, 2020 |             | 5     | 5          |
| Week 15, 2021 |             | 3     | 3          |
| Week 16, 2020 |             | 8     | 8          |
| Week 16, 2021 |             | 3     | 3          |
| Week 16, 2022 |             | 1     | 1          |
| Week 17, 2020 |             | 9     | 9          |
| Week 17, 2021 |             | 2     | 2          |
| Week 18, 2020 |             | 6     | 6          |
| Week 18, 2021 |             | 5     | 5          |
| Week 19, 2020 |             | 5     | 5          |
| Week 19, 2021 |             | 1     | 1          |
| Week 2, 2021  |             | 2     | 2          |
| Week 2, 2022  |             | 1     | 1          |
| Week 20, 2020 |             | 3     | 3          |
| Week 20, 2021 |             | 5     | 5          |
| Week 21, 2020 |             | 4     | 4          |
| Week 21, 2021 |             | 4     | 4          |
| Week 22, 2020 |             | 7     | 7          |
| Week 22, 2021 |             | 2     | 2          |
| Week 23, 2020 |             | 5     | 5          |
| Week 23, 2021 |             | 5     | 5          |
| Week 24, 2020 |             | 8     | 8          |
| Week 24, 2021 |             | 4     | 4          |
| Week 25, 2020 |             | 7     | 7          |

| Name          | Description | Files | References |
|---------------|-------------|-------|------------|
| Week 25, 2021 |             | 3     | 3          |
| Week 26, 2020 |             | 6     | 6          |
| Week 26, 2021 |             | 3     | 3          |
| Week 28, 2020 |             | 2     | 2          |
| Week 28, 2021 |             | 1     | 1          |
| Week 29, 2020 |             | 4     | 4          |
| Week 29, 2022 |             | 1     | 1          |
| Week 3, 2021  |             | 3     | 3          |
| Week 3, 2022  |             | 1     | 1          |
| Week 30, 2020 |             | 3     | 3          |
| Week 30, 2022 |             | 1     | 1          |
| Week 31, 2020 |             | 4     | 4          |
| Week 31, 2021 |             | 2     | 2          |
| Week 32, 2020 |             | 3     | 3          |
| Week 33, 2020 |             | 2     | 2          |
| Week 34 2022  |             | 1     | 1          |
| Week 34, 2020 |             | 1     | 1          |
| Week 34, 2021 |             | 1     | 1          |
| Week 35, 2020 |             | 1     | 1          |
| Week 35, 2021 |             | 1     | 1          |
| Week 36, 2020 |             | 1     | 1          |
| Week 36, 2021 |             | 1     | 1          |
| Week 36, 2022 |             | 1     | 1          |
| Week 37, 2020 |             | 3     | 3          |
| Week 38, 2020 |             | 5     | 5          |

| Name          | Description | Files | References |
|---------------|-------------|-------|------------|
| Week 38, 2021 |             | 2     | 2          |
| Week 39, 2020 |             | 5     | 5          |
| Week 39, 2021 |             | 3     | 3          |
| Week 39, 2022 |             | 1     | 1          |
| Week 4, 2020  |             | 1     | 1          |
| Week 4, 2021  |             | 3     | 3          |
| Week 4, 2022  |             | 1     | 1          |
| Week 40, 2020 |             | 7     | 7          |
| Week 40, 2022 |             | 1     | 1          |
| Week 41, 2020 |             | 2     | 2          |
| Week 41, 2021 |             | 1     | 1          |
| Week 42, 2020 |             | 2     | 2          |
| Week 42, 2021 |             | 1     | 1          |
| Week 42, 2022 |             | 1     | 1          |
| Week 43, 2021 |             | 2     | 2          |
| Week 44, 2020 |             | 1     | 1          |
| Week 44, 2021 |             | 3     | 3          |
| Week 45, 2020 |             | 5     | 5          |
| Week 45, 2021 |             | 2     | 2          |
| Week 46, 2020 |             | 3     | 3          |
| Week 46, 2021 |             | 1     | 1          |
| Week 47, 2020 |             | 4     | 4          |
| Week 47, 2021 |             | 1     | 1          |
| Week 48, 2020 |             | 5     | 5          |
| Week 48, 2021 |             | 1     | 1          |

| Name                                                                   | Description                                                                                                                                                                                                                                                                                                                                | Files | References |
|------------------------------------------------------------------------|--------------------------------------------------------------------------------------------------------------------------------------------------------------------------------------------------------------------------------------------------------------------------------------------------------------------------------------------|-------|------------|
| Week 49, 2020                                                          |                                                                                                                                                                                                                                                                                                                                            | 3     | 3          |
| Week 49, 2021                                                          |                                                                                                                                                                                                                                                                                                                                            | 2     | 2          |
| Week 5, 2020                                                           |                                                                                                                                                                                                                                                                                                                                            | 1     | 1          |
| Week 5, 2021                                                           |                                                                                                                                                                                                                                                                                                                                            | 2     | 2          |
| Week 50 2022                                                           |                                                                                                                                                                                                                                                                                                                                            | 1     | 1          |
| Week 50, 2020                                                          |                                                                                                                                                                                                                                                                                                                                            | 4     | 4          |
| Week 50, 2021                                                          |                                                                                                                                                                                                                                                                                                                                            | 2     | 2          |
| Week 51, 2020                                                          |                                                                                                                                                                                                                                                                                                                                            | 4     | 4          |
| Week 51, 2021                                                          |                                                                                                                                                                                                                                                                                                                                            | 2     | 2          |
| Week 51, 2022                                                          |                                                                                                                                                                                                                                                                                                                                            | 1     | 1          |
| Week 52, 2021                                                          |                                                                                                                                                                                                                                                                                                                                            | 2     | 2          |
| Week 53, 2020                                                          |                                                                                                                                                                                                                                                                                                                                            | 3     | 3          |
| Week 6, 2021                                                           |                                                                                                                                                                                                                                                                                                                                            | 2     | 2          |
| Week 7, 2021                                                           |                                                                                                                                                                                                                                                                                                                                            | 4     | 4          |
| Week 7, 2022                                                           |                                                                                                                                                                                                                                                                                                                                            | 2     | 2          |
| Week 8, 2021                                                           |                                                                                                                                                                                                                                                                                                                                            | 2     | 2          |
| Week 8, 2022                                                           |                                                                                                                                                                                                                                                                                                                                            | 1     | 1          |
| Week 9, 2020                                                           |                                                                                                                                                                                                                                                                                                                                            | 6     | 6          |
| Week 9, 2021                                                           |                                                                                                                                                                                                                                                                                                                                            | 1     | 1          |
| Decisions are evidence-based, tapping both social and natural sciences |                                                                                                                                                                                                                                                                                                                                            | 51    | 87         |
| Risk management and risk communication processes are transparent       | - Assumptions values, methods, and plans must be clear and accessible - When facts are unknown or uncertain, Health Canada will be clear about what gaps remain and what efforts are being taken to fill them - Must be clear about mistakes made and rectify them - When information has to be kept secret, need an explanation as to why | 321   | 1676       |
| Action Plan or Description                                             |                                                                                                                                                                                                                                                                                                                                            | 312   | 1090       |

| Name                                                                                         | Description                                                                                                                                                                                                                                                                                            | Files | References |
|----------------------------------------------------------------------------------------------|--------------------------------------------------------------------------------------------------------------------------------------------------------------------------------------------------------------------------------------------------------------------------------------------------------|-------|------------|
| Address uniqueness                                                                           |                                                                                                                                                                                                                                                                                                        | 3     | 3          |
| Case Descriptions                                                                            |                                                                                                                                                                                                                                                                                                        | 17    | 31         |
| Explanation or Convincing the Public                                                         |                                                                                                                                                                                                                                                                                                        | 33    | 45         |
| Vaccines                                                                                     |                                                                                                                                                                                                                                                                                                        | 70    | 102        |
| Variants                                                                                     |                                                                                                                                                                                                                                                                                                        | 22    | 28         |
| Stakeholders are the focal point                                                             |                                                                                                                                                                                                                                                                                                        | 270   | 1041       |
| Businesses                                                                                   |                                                                                                                                                                                                                                                                                                        | 29    | 57         |
| Education                                                                                    |                                                                                                                                                                                                                                                                                                        | 17    | 60         |
| Elderly (help the elderly, appeal to the elderly)                                            |                                                                                                                                                                                                                                                                                                        | 36    | 78         |
| Family                                                                                       |                                                                                                                                                                                                                                                                                                        | 3     | 6          |
| Healthcare and Frontline Workers                                                             |                                                                                                                                                                                                                                                                                                        | 85    | 160        |
| Other Workers                                                                                |                                                                                                                                                                                                                                                                                                        | 9     | 17         |
| Public-centered                                                                              |                                                                                                                                                                                                                                                                                                        | 206   | 409        |
| Researchers                                                                                  |                                                                                                                                                                                                                                                                                                        | 1     | 4          |
| Strategic risk communications is integral to integrated risk management                      | - Integrated risk management: organization-wide approach to managing risk at the strategic, operational, and project level - Apply sound risk management practices and fostering a working culture that values learning, collaboration, innovation, responsible risk-taking and continuous improvement | 308   | 782        |
| Act, Group, Law, etc.                                                                        |                                                                                                                                                                                                                                                                                                        | 235   | 464        |
| What's being done (explanation or name)                                                      |                                                                                                                                                                                                                                                                                                        | 183   | 207        |
| The strategic risk communications process requires continuous improvement through evaluation | - Calls for clear, measurable objectives - Self-evaluated continuously to maintain excellence                                                                                                                                                                                                          | 18    | 20         |
