# Supplementary material for: Content Analysis of Official Public Health Communications in Ontario, Canada during the COVID-19 Pandemic
Source: Int J Environ Res Public Health. 2024 Mar 15;21(3):351. doi: 10.3390/ijerph21030351 (PMC10970262; doi:10.3390/ijerph21030351)
Supplement: Supplementary file 1 [file ijerph-21-00351-s001.zip › MF_IJERPH_Links to news releases.xlsx]

## Sheet: Sheet1
2020-01-25	News Release	Health	https://news.ontario.ca/en/release/55486/ontario-confirms-first-case-of-wuhan-novel-coronavirus
2020-01-31	News Release	Health	https://news.ontario.ca/en/release/55602/ontario-confirms-third-case-of-2019-novel-coronavirus
2020-02-23	News Release	Health	https://news.ontario.ca/en/release/55875/ontario-confirms-presumptive-case-of-covid-19
2020-02-26	News Release	Health	https://news.ontario.ca/en/release/55909/ontario-confirms-positive-case-of-covid-19
2020-02-27	News Release	Health	https://news.ontario.ca/en/release/55928/ontario-confirms-positive-case-of-covid-19
2020-02-28	News Release	Health	https://news.ontario.ca/en/release/55967/ontario-confirms-new-positive-case-of-covid-19
2020-02-28	News Release	Health	https://news.ontario.ca/en/release/56018/ontario-confirms-new-positive-case-of-covid-19
2020-02-29	News Release	Health	https://news.ontario.ca/en/release/56020/ontario-confirms-new-positive-cases-of-covid-19
2020-03-01	News Release	Health	https://news.ontario.ca/en/release/56025/ontario-confirms-new-positive-cases-of-covid-19
2020-03-02	News Release	Health	https://news.ontario.ca/en/release/56030/ontario-implementing-enhanced-measures-to-safeguard-public-from-covid-19
2020-03-03	News Release	Health	https://news.ontario.ca/en/release/56068/ontario-confirms-new-positive-cases-of-covid-19
2020-03-05	News Release	Health	https://news.ontario.ca/en/release/56092/ontario-confirms-new-positive-cases-of-covid-19
2020-03-06	News Release	Health	https://news.ontario.ca/en/release/56115/ontario-confirms-new-positive-cases-of-covid-19
2020-03-06	News Release	Health	https://news.ontario.ca/en/release/56159/ontario-confirms-new-positive-cases-of-covid-19
2020-03-08	News Release	Health	https://news.ontario.ca/en/release/56174/ontario-confirms-new-positive-case-of-covid-19
2020-03-08	News Release	Health	https://news.ontario.ca/en/release/56178/ontario-confirms-new-positive-cases-of-covid-19
2020-03-09	News Release	Health	https://news.ontario.ca/en/release/56180/ontario-making-it-easier-for-public-to-stay-informed-about-covid-19
2020-03-12	News Release	Health	https://news.ontario.ca/en/release/56257/correction-province-implementing-enhanced-measures-to-protect-ontarians-from-covid-19
2020-03-16	News Release	Health	https://news.ontario.ca/en/release/56332/province-expanding-telehealth-ontario-resources
2020-03-16	News Release	Office of the Premier	https://news.ontario.ca/en/release/56337/premier-ford-announces-job-protection-for-workers-during-the-covid-19-situation
2020-03-17	News Release	Office of the Premier	https://news.ontario.ca/en/release/56356/ontario-enacts-declaration-of-emergency-to-protect-the-public
2020-03-18	News Release	Health	https://news.ontario.ca/en/release/56366/ontario-taking-another-step-to-integrate-the-health-care-system
2020-03-19	News Release	Office of the Premier	https://news.ontario.ca/en/release/56384/ontario-supporting-workers-municipalities-and-retailers-in-response-to-covid-19
2020-03-20	News Release	Health	https://news.ontario.ca/en/release/56401/ontario-expands-coverage-for-care
2020-03-20	News Release	Office of the Premier	https://news.ontario.ca/en/release/56396/ontario-helping-students-learn-from-the-safety-of-their-own-home
2020-03-21	News Release	Health	https://news.ontario.ca/en/release/56419/ontario-takes-extraordinary-steps-to-ensure-health-care-resources-are-available-to-contain-covid-19
2020-03-21	News Release	Office of the Premier	https://news.ontario.ca/en/release/56415/ontario-urges-business-to-join-the-fight-against-covid-19
2020-03-23	News Release	Health	https://news.ontario.ca/en/release/56427/ontario-significantly-enhancing-covid-19-screening-measures-and-supports
2020-03-23	News Release	Office of the Premier	https://news.ontario.ca/en/release/56433/ontario-protecting-the-most-vulnerable-during-covid-19-crisis
2020-03-23	News Release	Office of the Premier	https://news.ontario.ca/en/release/56435/ontario-orders-the-mandatory-closure-of-all-non-essential-workplaces-to-fight-spread-of-covid-19
2020-03-23	News Release	Office of the Premier	https://news.ontario.ca/en/release/56444/ontario-closing-at-risk-workplaces-to-protect-health-and-safety
2020-03-24	News Release	Office of the Premier	https://news.ontario.ca/en/release/56451/ontario-providing-electricity-relief-to-families-small-businesses-and-farms-during-covid-19
2020-03-25	News Release	Office of the Premier	https://news.ontario.ca/en/release/56459/stop-the-spread-business-information-line-now-open-at-1-888-444-3659
2020-03-26	News Release	Office of the Premier	https://news.ontario.ca/en/release/56475/ontario-provides-33-billion-more-to-increase-health-care-capacity
2020-03-28	News Release	Office of the Premier	https://news.ontario.ca/en/release/56500/ontario-protecting-consumers-from-price-gouging
2020-03-28	News Release	Office of the Premier	https://news.ontario.ca/en/release/56507/ontario-prohibits-gatherings-of-more-than-five-people-with-strict-exceptions
2020-03-30	News Release	Health	https://news.ontario.ca/en/release/56513/ontario-enhancing-public-reporting-about-covid-19
2020-03-30	News Release	Office of the Premier	https://news.ontario.ca/en/release/56517/ontario-protecting-seniors-during-the-covid-19-outbreak
2020-03-30	News Release	Office of the Premier	https://news.ontario.ca/en/release/56523/ontario-extends-emergency-declaration-to-stop-the-spread-of-covid-19
2020-03-31	News Release	Office of the Premier	https://news.ontario.ca/en/release/56529/ontario-extends-school-and-child-care-closures-to-fight-spread-of-covid-19
2020-04-01	News Release	Office of the Premier	https://news.ontario.ca/en/release/56537/ontario-joins-forces-with-the-private-sector-to-fight-covid-19
2020-04-02	News Release	Office of the Premier	https://news.ontario.ca/en/release/56547/ontario-increasing-mental-health-support-during-covid-19
2020-04-03	News Release	Health	https://news.ontario.ca/en/release/56557/ontario-increasing-public-health-units-capacity-to-stop-covid-19
2020-04-03	News Release	Office of the Premier	https://news.ontario.ca/en/release/56560/ontario-extends-business-closures-to-stop-the-spread-of-covid-19
2020-04-03	News Release	Office of the Premier	https://news.ontario.ca/en/release/56559/ontario-provides-full-transparency-by-releasing-covid-19-modelling
2020-04-06	News Release	Office of the Premier	https://news.ontario.ca/en/release/56592/ontario-government-supports-families-in-response-to-covid-19
2020-04-07	News Release	Office of the Premier	https://news.ontario.ca/en/release/56598/ontario-calls-on-all-health-care-workers-to-help-fight-covid-19
2020-04-08	News Release	Office of the Premier	https://news.ontario.ca/en/release/56608/ontario-accelerates-essential-construction-projects-during-covid-19
2020-04-10	News Release	Office of the Premier	https://news.ontario.ca/en/release/56644/ontario-significantly-expanding-covid-19-testing
2020-04-11	News Release	Office of the Premier	https://news.ontario.ca/en/release/56653/ontario-businesses-stepping-up-to-fight-covid-19
2020-04-12	News Release	Health	https://news.ontario.ca/en/release/56659/province-developing-new-health-data-platform-to-help-defeat-covid-19
2020-04-13	News Release	Office of the Premier	https://news.ontario.ca/en/release/56663/ontario-secures-critical-medical-equipment-and-supplies
2020-04-14	News Release	Office of the Premier	https://news.ontario.ca/en/release/56674/ontario-extends-declaration-of-emergency-to-continue-the-fight-against-covid-19
2020-04-15	News Release	Office of the Premier	https://news.ontario.ca/en/release/56681/ontario-ramping-up-protection-for-long-term-care-residents
2020-04-16	News Release	Office of the Premier	https://news.ontario.ca/en/release/56688/ontario-significantly-expands-hospital-capacity-to-prepare-for-any-covid-19-outbreak-scenario
2020-04-17	News Release	Office of the Premier	https://news.ontario.ca/en/release/56694/ontario-takes-further-action-to-protect-vulnerable-people-from-covid-19
2020-04-17	News Release	Office of the Premier	https://news.ontario.ca/en/release/56696/ontario-offers-emergency-child-care-to-more-frontline-staff
2020-04-18	News Release	Office of the Premier	https://news.ontario.ca/en/release/56710/province-calls-for-innovative-solutions-to-combat-covid-19
2020-04-20	News Release	Office of the Premier	https://news.ontario.ca/en/release/56722/health-experts-say-the-covid-19-outbreak-has-likely-peaked-in-ontario
2020-04-21	News Release	Office of the Premier	https://news.ontario.ca/en/release/56728/ontario-providing-additional-relief-to-the-provinces-most-vulnerable
2020-04-22	News Release	Office of the Premier	https://news.ontario.ca/en/release/56737/ontario-takes-immediate-steps-to-further-protect-long-term-care-residents-and-staff-during-covid-19-outbreak
2020-04-23	News Release	Office of the Premier	https://news.ontario.ca/en/release/56746/ontario-extends-emergency-orders-to-help-stop-the-spread-of-covid-19
2020-04-23	News Release	Office of the Premier	https://news.ontario.ca/en/release/56747/ontario-delivers-action-plan-to-increase-protection-for-vulnerable-people-and-those-who-care-for-them
2020-04-24	News Release	Office of the Premier	https://news.ontario.ca/en/release/56756/ontario-provides-urgent-relief-for-small-businesses-and-landlords
2020-04-25	News Release	Office of the Premier	https://news.ontario.ca/en/release/56764/ontario-allows-the-redeployment-of-staff-to-better-care-for-vulnerable-people-during-covid-19
2020-04-25	News Release	Office of the Premier	https://news.ontario.ca/en/release/56768/ontario-supporting-frontline-heroes-of-covid-19-with-pandemic-pay
2020-04-27	News Release	Office of the Premier	https://news.ontario.ca/en/release/56780/ontario-unveils-guiding-principles-to-reopen-the-province
2020-04-28	News Release	Office of the Premier	https://news.ontario.ca/en/release/56792/ontario-helping-businesses-overcome-the-unique-challenges-created-by-covid-19
2020-04-29	News Release	Office of the Premier	https://news.ontario.ca/en/release/56802/more-frontline-workers-eligible-for-emergency-child-care
2020-04-30	News Release	Office of the Premier	https://news.ontario.ca/en/release/56808/ontario-providing-employers-with-workplace-safety-guidelines
2020-05-01	News Release	Office of the Premier	https://news.ontario.ca/en/release/56820/certain-businesses-allowed-to-reopen-under-strict-safety-guidelines
2020-05-01	News Release	Office of the Premier	https://news.ontario.ca/en/release/56823/ontario-takes-additional-steps-to-improve-health-care-flexibility-during-covid-19-outbreak
2020-05-04	News Release	Office of the Premier	https://news.ontario.ca/en/release/56839/ontario-significantly-increases-daily-lab-testing
2020-05-05	News Release	Office of the Premier	https://news.ontario.ca/en/release/56847/ontario-expands-virtual-mental-health-services-during-covid-19
2020-05-06	News Release	Office of the Premier	https://news.ontario.ca/en/release/56858/ontario-further-eases-restrictions-on-retail-stores-and-essential-construction-during-covid-19
2020-05-07	News Release	Office of the Premier	https://news.ontario.ca/en/release/56867/ontario-releases-plan-to-resume-scheduled-surgeries-and-procedures
2020-05-08	News Release	Office of the Premier	https://news.ontario.ca/en/release/56884/ontario-supports-job-creators-as-people-start-returning-to-work
2020-05-09	News Release	Office of the Premier	https://news.ontario.ca/en/release/56901/ontario-enables-school-board-employees-to-be-voluntarily-redeployed-to-congregate-care-settings
2020-05-11	News Release	Office of the Premier	https://news.ontario.ca/en/release/56916/ontario-retail-stores-open-for-curbside-pickup-and-delivery
2020-05-13	News Release	Health	https://news.ontario.ca/en/release/56942/ontario-making-prescription-drugs-more-affordable-during-covid-19
2020-05-13	News Release	Office of the Premier	https://news.ontario.ca/en/release/56932/ontario-takes-steps-to-better-protect-long-term-care-residents-and-staff-during-the-covid-19-outbreak
2020-05-19	News Release	Office of the Premier	https://news.ontario.ca/en/release/56968/ontario-extends-emergency-orders-to-keep-people-safe
2020-05-19	News Release	Office of the Premier	https://news.ontario.ca/en/release/56971/health-and-safety-top-priority-as-schools-remain-closed
2020-05-20	News Release	Office of the Premier	https://news.ontario.ca/en/release/56983/as-ontario-reopens-people-urged-to-continue-following-public-health-advice
2020-05-21	News Release	Office of the Premier	https://news.ontario.ca/en/release/56991/ontario-leading-covid-19-research-in-canada
2020-05-25	News Release	Office of the Premier	https://news.ontario.ca/en/release/57013/volunteers-and-small-businesses-step-up-to-help-those-in-need
2020-05-26	News Release	Office of the Premier	https://news.ontario.ca/en/release/57021/ontario-takes-immediate-action-to-investigate-worst-hit-long-term-care-homes
2020-05-27	News Release	Office of the Premier	https://news.ontario.ca/en/release/57027/ontario-extending-emergency-orders-during-covid-19-outbreak
2020-05-27	News Release	Office of the Premier	https://news.ontario.ca/en/release/57033/ontario-taking-action-at-high-risk-long-term-care-homes
2020-05-28	News Release	Office of the Premier	https://news.ontario.ca/en/release/57041/ontario-takes-further-action-to-protect-seniors-and-staff-in-long-term-care-homes-during-covid-19-outbreak
2020-05-29	News Release	Office of the Premier	https://news.ontario.ca/en/release/57053/ontario-opens-up-covid-19-testing-across-the-province
2020-05-30	News Release	Office of the Premier	https://news.ontario.ca/en/release/57057/ontario-takes-additional-steps-to-protect-seniors-in-retirement-homes-during-covid-19
2020-06-02	News Release	Office of the Premier	https://news.ontario.ca/en/release/57091/ontario-helps-manufacturers-ramp-up-production-of-personal-protective-equipment
2020-06-02	News Release	Office of the Premier	https://news.ontario.ca/en/release/57093/ontario-extends-declaration-of-emergency-until-june-30
2020-06-03	News Release	Office of the Premier	https://news.ontario.ca/en/release/57104/ontario-improving-broadband-and-cell-service-for-rural-communities
2020-06-04	News Release	Health	https://news.ontario.ca/en/release/57110/ontario-appoints-special-advisor-to-develop-health-data-platform
2020-06-04	News Release	Office of the Premier	https://news.ontario.ca/en/release/57113/ontario-creates-premiers-council-on-equality-of-opportunity
2020-06-06	News Release	Office of the Premier	https://news.ontario.ca/en/release/57126/ontario-extends-emergency-orders-to-support-its-reopening-efforts
2020-06-08	News Release	Office of the Premier	https://news.ontario.ca/en/release/57132/ontario-permits-more-businesses-and-services-to-reopen-in-the-coming-days
2020-06-09	News Release	Office of the Premier	https://news.ontario.ca/en/release/57142/ontario-helping-parents-return-to-work
2020-06-10	News Release	Office of the Premier	https://news.ontario.ca/en/release/57150/ontario-unveils-a-plan-to-reopen-postsecondary-education
2020-06-11	News Release	Health	https://news.ontario.ca/en/release/57168/ontario-appoints-new-patient-ombudsman
2020-06-11	News Release	Health	https://news.ontario.ca/en/release/57185/ontario-lifting-30-day-supply-limit-on-prescriptions
2020-06-11	News Release	Office of the Premier	https://news.ontario.ca/en/release/57177/ontario-to-resume-family-visits-in-long-term-care-homes-retirement-homes-and-other-residential-care-settings
2020-06-12	News Release	Office of the Premier	https://news.ontario.ca/en/release/57194/ontarians-encouraged-to-establish-social-circles
2020-06-13	News Release	Health	https://news.ontario.ca/en/release/57197/ontario-eases-restrictions-on-wedding-and-funeral-ceremonies
2020-06-15	News Release	Health	https://news.ontario.ca/en/release/57217/ontario-expanding-data-collection-to-help-stop-spread-of-covid-19
2020-06-15	News Release	Office of the Premier	https://news.ontario.ca/en/release/57209/more-people-can-get-back-to-work-as-additional-businesses-and-services-to-reopen-this-week
2020-06-16	News Release	Office of the Premier	https://news.ontario.ca/en/release/57230/ontario-releases-guide-on-how-to-develop-a-workplace-safety-plan
2020-06-17	News Release	Office of the Premier	https://news.ontario.ca/en/release/57241/ontario-extends-emergency-orders
2020-06-18	News Release	Office of the Premier	https://news.ontario.ca/en/release/57279/ontario-enhancing-covid-19-case-and-contact-management
2020-06-19	News Release	Office of the Premier	https://news.ontario.ca/en/release/57309/ontario-prepares-for-the-safe-reopening-of-schools
2020-06-22	News Release	Office of the Premier	https://news.ontario.ca/en/release/57325/ontario-moving-toronto-and-peel-region-into-stage-2
2020-06-24	News Release	Office of the Premier	https://news.ontario.ca/en/release/57362/ontario-extends-declaration-of-emergency-to-july-15
2020-06-24	News Release	Office of the Premier	https://news.ontario.ca/en/release/57366/ontario-takes-immediate-action-to-stop-covid-19-outbreaks-in-windsor-essex
2020-06-24	News Release	Office of the Premier	https://news.ontario.ca/en/release/57374/businesses-and-services-to-reopen-in-windsor-essex-with-exceptions
2020-06-26	News Release	Office of the Premier	https://news.ontario.ca/en/release/57413/ontario-providing-additional-support-for-seniors
2020-06-27	News Release	Office of the Premier	https://news.ontario.ca/en/release/57421/ontario-extends-emergency-orders-to-july-10
2020-07-07	News Release	Office of the Premier	https://news.ontario.ca/en/release/57509/ontario-introduces-legislation-to-protect-public-health-as-economy-reopens
2020-07-09	News Release	Office of the Premier	https://news.ontario.ca/en/release/57535/ontario-extends-emergency-orders
2020-07-13	News Release	Office of the Premier	https://news.ontario.ca/en/release/57575/nearly-all-businesses-and-public-spaces-to-reopen-in-stage-3
2020-07-14	News Release	Office of the Premier	https://news.ontario.ca/en/release/57587/province-supports-development-of-made-in-ontario-n95-respirators
2020-07-16	News Release	Office of the Premier	https://news.ontario.ca/en/release/57622/ontario-extends-emergency-orders
2020-07-17	News Release	Office of the Premier	https://news.ontario.ca/en/release/57653/province-takes-steps-to-ensure-all-ontarians-benefit-from-local-research-and-innovation
2020-07-20	News Release	Office of the Premier	https://news.ontario.ca/en/release/57676/ontario-moving-more-regions-into-stage-3
2020-07-22	News Release	Office of the Premier	https://news.ontario.ca/en/release/57711/ontario-legislature-adjourns-after-significant-sitting-in-response-to-covid-19
2020-07-23	News Release	Health	https://news.ontario.ca/en/release/57724/ontario-announces-five-new-ontario-health-teams
2020-07-29	News Release	Office of the Premier	https://news.ontario.ca/en/release/57798/ontario-moving-toronto-and-peel-region-into-stage-3
2020-07-29	News Release	Office of the Premier	https://news.ontario.ca/en/release/57815/ontario-launches-independent-long-term-care-covid-19-commission
2020-07-31	News Release	Health	https://news.ontario.ca/en/release/57850/ontario-implementing-additional-measures-at-bars-and-restaurants-to-help-limit-the-spread-of-covid-19
2020-07-31	News Release	Office of the Premier	https://news.ontario.ca/en/release/57862/covid-alert-available-for-download-beginning-today
2020-08-04	News Release	Health	https://news.ontario.ca/en/release/57876/windsor-essex-remains-in-stage-2
2020-08-04	News Release	Office of the Premier	https://news.ontario.ca/en/release/57880/province-supporting-innovative-made-in-ontario-technology-to-sanitize-ppe
2020-08-07	News Release	Health	https://news.ontario.ca/en/release/57934/ontario-celebrates-groves-memorial-community-hospitals-grand-opening
2020-08-10	News Release	Office of the Premier	https://news.ontario.ca/en/release/57940/windsor-essex-to-join-the-rest-of-province-in-stage-3
2020-08-12	News Release	Office of the Premier	https://news.ontario.ca/en/release/57970/ontario-providing-municipalities-with-up-to-16-billion-in-first-round-of-emergency-funding
2020-08-21	News Release	Office of the Premier	https://news.ontario.ca/en/release/58102/ontario-partners-with-federal-government-and-3m-canada-on-new-n95-respirator-manufacturing-facility
2020-08-26	News Release	Office of the Premier	https://news.ontario.ca/en/release/58136/ontario-releases-covid-19-management-plan-for-schools
2020-09-04	News Release	Office of the Premier	https://news.ontario.ca/en/release/58262/province-supports-ontario-made-face-masks-in-the-fight-against-covid-19
2020-09-08	News Release	Office of the Premier	https://news.ontario.ca/en/release/58295/ontario-takes-extraordinary-steps-to-reopen-schools-safely
2020-09-09	News Release	Office of the Premier	https://news.ontario.ca/en/release/58314/ontario-quebec-summit-strengthens-ties-between-the-two-provinces
2020-09-10	News Release	Office of the Premier	https://news.ontario.ca/en/release/58333/ontario-expanding-innovative-mental-health-and-addictions-services
2020-09-14	News Release	Health	https://news.ontario.ca/en/release/58366/ontario-investing-in-hospital-upgrades-and-repairs
2020-09-15	News Release	Office of the Premier	https://news.ontario.ca/en/release/58380/province-ramps-up-production-of-ontario-made-ventilators
2020-09-17	News Release	Health	https://news.ontario.ca/en/release/58402/lower-limits-for-unmonitored-and-private-social-gatherings-in-ottawa-peel-and-toronto-regions
2020-09-19	News Release	Office of the Premier	https://news.ontario.ca/en/release/58449/ontario-limits-the-size-of-unmonitored-and-private-social-gatherings-across-entire-province
2020-09-22	News Release	Office of the Premier	https://news.ontario.ca/en/release/58474/ontario-set-to-launch-largest-flu-immunization-campaign-in-provinces-history
2020-09-23	News Release	Office of the Premier	https://news.ontario.ca/en/release/58492/ontario-expands-covid-19-testing-to-pharmacies
2020-09-24	News Release	Office of the Premier	https://news.ontario.ca/en/release/58515/ontario-investing-more-than-1-billion-to-expand-covid-19-testing-and-contact-tracing
2020-09-25	News Release	Health	https://news.ontario.ca/en/release/58548/new-public-health-measures-implemented-provincewide-to-keep-ontarians-safe
2020-09-25	News Release	Office of the Premier	https://news.ontario.ca/en/release/58557/ontario-investing-741-million-to-reduce-surgeries-backlog-and-expand-access-to-care
2020-09-28	News Release	Office of the Premier	https://news.ontario.ca/en/release/58580/ontario-investing-525-million-to-recruit-retain-and-support-more-health-care-workers
2020-09-29	News Release	Office of the Premier	https://news.ontario.ca/en/release/58590/ontario-providing-over-half-a-billion-dollars-to-protect-vulnerable-seniors-against-second-wave-of-covid-19
2020-09-30	News Release	Health	https://news.ontario.ca/en/release/58602/ontario-releases-updated-covid-19-modelling-for-second-wave
2020-09-30	News Release	Office of the Premier	https://news.ontario.ca/en/release/58610/ontario-delivers-28-billion-covid-19-fall-preparedness-plan
2020-10-01	News Release	Health	https://news.ontario.ca/en/release/58629/ontario-revises-covid-19-screening-guidance-for-schools-and-child-care
2020-10-01	News Release	Office of the Premier	https://news.ontario.ca/en/release/58627/ontario-provides-461-million-to-temporarily-enhance-wages-for-personal-support-workers
2020-10-02	News Release	Office of the Premier	https://news.ontario.ca/en/release/58645/ontario-implementing-additional-public-health-and-testing-measures-to-keep-people-safe
2020-10-05	News Release	Office of the Premier	https://news.ontario.ca/en/release/58670/ontario-releases-35-million-to-hire-more-staff-improve-remote-learning-in-targeted-communities
2020-10-06	News Release	Office of the Premier	https://news.ontario.ca/en/release/58686/ontario-surpasses-four-million-covid-19-tests
2020-10-09	News Release	Office of the Premier	https://news.ontario.ca/en/release/58767/ontario-implementing-additional-public-health-measures-in-toronto-ottawa-and-peel-region
2020-10-15	News Release	Health	https://news.ontario.ca/en/release/58823/ontario-adding-over-200-more-transitional-care-beds-across-the-province
2020-10-15	News Release	Office of the Premier	https://news.ontario.ca/en/release/58831/millions-across-canada-now-using-made-in-ontario-covid-alert-app
2020-10-16	News Release	Health	https://news.ontario.ca/en/release/58842/ontario-moving-additional-region-to-modified-stage-2
2020-10-27	News Release	Office of the Premier	https://news.ontario.ca/en/release/58955/ontario-adding-over-760-hospital-beds-across-the-province
2020-11-02	News Release	Office of the Premier	https://news.ontario.ca/en/release/59030/province-increasing-direct-care-for-long-term-care-residents-to-four-hours-per-day
2020-11-03	News Release	Office of the Premier	https://news.ontario.ca/en/release/59051/ontario-releases-covid-19-response-framework-to-help-keep-the-province-safe-and-open
2020-11-06	News Release	Health	https://news.ontario.ca/en/release/59081/ontario-moves-public-health-unit-regions-into-covid-19-response-framework-to-keep-ontario-safe-and-open
2020-11-06	News Release	Office of the Premier	https://news.ontario.ca/en/release/59083/ontario-investing-152-billion-to-protect-people-and-support-health-care-during-covid-19
2020-11-09	News Release	Health	https://news.ontario.ca/en/release/59104/ontario-providing-additional-public-health-support-for-peel-region
2020-11-13	News Release	Office of the Premier	https://news.ontario.ca/en/release/59205/ontario-updating-covid-19-response-framework-to-help-stop-the-spread-of-covid-19
2020-11-18	News Release	Office of the Premier	https://news.ontario.ca/en/release/59252/ontario-announces-13-new-ontario-health-teams
2020-11-19	News Release	Office of the Premier	https://news.ontario.ca/en/release/59276/ontario-launches-workplace-education-and-enforcement-campaigns
2020-11-20	News Release	Office of the Premier	https://news.ontario.ca/en/release/59305/ontario-taking-further-action-to-stop-the-spread-of-covid-19
2020-11-23	News Release	Office of the Premier	https://news.ontario.ca/en/release/59318/ontario-appoints-new-ministers-covid-19-vaccine-distribution-task-force
2020-11-24	News Release	Office of the Premier	https://news.ontario.ca/en/release/59330/ontario-deploys-rapid-testing-to-support-covid-19-response
2020-11-25	News Release	Office of the Premier	https://news.ontario.ca/en/release/59338/celebrate-the-holiday-season-safely
2020-11-26	News Release	Office of the Premier	https://news.ontario.ca/en/release/59365/ontario-providing-additional-funding-to-enhance-safety-and-protection-in-schools
2020-11-27	News Release	Health	https://news.ontario.ca/en/release/59388/ontario-moving-regions-to-new-levels-in-covid-19-response-framework
2020-11-27	News Release	Office of the Premier	https://news.ontario.ca/en/release/59401/ontario-calls-on-ottawa-for-certainty-as-covid-19-vaccine-preparation-continues
2020-12-01	News Release	Health	https://news.ontario.ca/en/release/59425/ontario-collaborates-with-industry-experts-to-plan-the-covid-19-vaccine-rollout
2020-12-02	News Release	Office of the Premier	https://news.ontario.ca/en/release/59437/ontario-expanding-innovative-home-and-community-care-services
2020-12-04	News Release	Health	https://news.ontario.ca/en/release/59489/ontario-moving-three-regions-to-new-levels-in-covid-19-response-framework
2020-12-07	News Release	Office of the Premier	https://news.ontario.ca/en/release/59508/ontario-identifies-key-groups-for-distribution-of-initial-covid-19-vaccines
2020-12-10	News Release	Health	https://news.ontario.ca/en/release/59549/ontario-expands-funding-for-supportive-housing
2020-12-11	News Release	Health	https://news.ontario.ca/en/release/59603/ontario-moving-regions-to-new-levels-with-stronger-public-health-measures
2020-12-11	News Release	Office of the Premier	https://news.ontario.ca/en/release/59607/ontario-begins-rollout-of-covid-19-vaccine
2020-12-14	News Release	Health	https://news.ontario.ca/en/release/59628/ontario-updates-testing-guidelines-for-outbound-international-travellers
2020-12-17	News Release	Health	https://news.ontario.ca/en/release/59716/ontario-increasing-mental-health-and-addictions-services
2020-12-18	News Release	Health	https://news.ontario.ca/en/release/59753/ontario-expands-covid-19-vaccine-locations
2020-12-18	News Release	Health	https://news.ontario.ca/en/release/59776/ontario-taking-further-action-to-limit-spread-of-covid-19
2020-12-26	News Release	Health	https://news.ontario.ca/en/release/59831/ontario-confirms-first-cases-of-covid-19-uk-variant-in-ontario
2020-12-27	News Release	Health	https://news.ontario.ca/en/release/59833/ontario-provides-update-on-ontario-cases-of-covid-19-uk-variant
2020-12-30	News Release	Health	https://news.ontario.ca/en/release/59850/ontario-releases-ethical-framework-for-covid-19-vaccine-distribution
2021-01-05	News Release	Health	https://news.ontario.ca/en/release/59871/ontario-accelerates-covid-19-vaccinations-for-long-term-care-homes-in-priority-regions
2021-01-06	News Release	Office of the Premier	https://news.ontario.ca/en/release/59877/ontario-launches-innovative-testing-program-at-pearson-airport
2021-01-12	News Release	Office of the Premier	https://news.ontario.ca/en/release/59922/ontario-declares-second-provincial-emergency-to-address-covid-19-crisis-and-save-lives
2021-01-13	News Release	Office of the Premier	https://news.ontario.ca/en/release/59934/ontario-to-vaccinate-up-to-85-million-people-in-phase-two
2021-01-15	News Release	Health	https://news.ontario.ca/en/release/59964/ontario-expands-case-and-contact-management-workforce
2021-01-18	News Release	Office of the Premier	https://news.ontario.ca/en/release/59982/ontario-adding-over-500-hospital-beds-to-expand-critical-care-capacity
2021-01-19	News Release	Office of the Premier	https://news.ontario.ca/en/release/60011/ontario-achieves-key-milestone-with-vaccinations-in-long-term-care
2021-01-21	News Release	Health	https://news.ontario.ca/en/release/60034/ontario-adding-more-mental-health-beds-and-programs-for-seniors
2021-01-25	News Release	Office of the Premier	https://news.ontario.ca/en/release/60091/ontario-adjusts-vaccination-plan-in-response-to-pfizer-biontech-shipment-delays
2021-01-26	News Release	Office of the Premier	https://news.ontario.ca/en/release/60117/further-action-needed-to-protect-the-border-and-stop-the-spread-of-covid-19
2021-01-29	News Release	Office of the Premier	https://news.ontario.ca/en/release/60176/ontario-takes-immediate-action-to-stop-the-spread-of-covid-19-variants
2021-02-01	News Release	Office of the Premier	https://news.ontario.ca/en/release/60190/ontario-community-support-program-extended-until-2022
2021-02-02	News Release	Office of the Premier	https://news.ontario.ca/en/release/60208/ontario-continues-accelerated-vaccinations-of-most-vulnerable-despite-vaccine-delays
2021-02-08	News Release	Office of the Premier	https://news.ontario.ca/en/release/60261/ontario-extending-stay-at-home-order-across-most-of-the-province-to-save-lives
2021-02-09	News Release	Office of the Premier	https://news.ontario.ca/en/release/60282/ontario-supporting-covid-19-response-in-high-priority-communities
2021-02-12	News Release	Health	https://news.ontario.ca/en/release/60337/ontario-deploys-rapid-tests-to-more-essential-workplaces-and-settings
2021-02-12	News Release	Health	https://news.ontario.ca/en/release/60339/ontario-returning-27-public-health-regions-to-strengthened-covid-19-response-framework
2021-02-19	News Release	Health	https://news.ontario.ca/en/release/60396/stay-at-home-order-extended-in-toronto-and-peel-public-health-regions-along-with-north-bay-parry-sound
2021-02-19	News Release	Office of the Premier	https://news.ontario.ca/en/release/60389/ontario-administers-over-half-a-million-doses-of-covid-19-vaccines
2021-02-26	News Release	Health	https://news.ontario.ca/en/release/60489/ontario-activates-emergency-brake-in-thunder-bay-district-health-unit-and-simcoe-muskoka-district-health-unit
2021-03-05	News Release	Health	https://news.ontario.ca/en/release/60580/toronto-peel-and-north-bay-parry-sound-public-health-regions-returning-to-strengthened-covid-19-response-framework
2021-03-05	News Release	Office of the Premier	https://news.ontario.ca/en/release/60568/ontario-ready-to-rollout-phase-two-of-covid-19-vaccine-distribution-plan
2021-03-08	News Release	Health	https://news.ontario.ca/en/release/60596/ontario-completes-all-first-dose-covid-19-vaccinations-in-northern-remote-indigenous-communities
2021-03-10	News Release	Office of the Premier	https://news.ontario.ca/en/release/60628/ontario-pharmacies-and-primary-care-settings-to-begin-offering-covid-19-vaccinations
2021-03-11	News Release	Health	https://news.ontario.ca/en/release/60644/ontario-activates-emergency-brake-in-sudbury-public-health-region
2021-03-12	News Release	Health	https://news.ontario.ca/en/release/60680/ontario-moving-three-regions-to-new-levels-in-the-covid-19-response-framework
2021-03-14	News Release	Health	https://news.ontario.ca/en/release/60688/ontario-launching-provincial-booking-system-for-covid-19-vaccines
2021-03-17	News Release	Health	https://news.ontario.ca/en/release/60748/ontario-taking-further-steps-to-support-integrated-patient-care
2021-03-18	News Release	Health	https://news.ontario.ca/en/release/60782/ottawa-public-health-region-moving-to-red-control-level-of-covid-19-response-framework
2021-03-18	News Release	Health	https://news.ontario.ca/en/release/60798/ontario-extending-temporary-wage-enhancement-for-personal-support-workers
2021-03-19	News Release	Health	https://news.ontario.ca/en/release/60831/ontario-moving-eight-regions-to-new-levels-in-the-covid-19-response-framework
2021-03-19	News Release	Office of the Premier	https://news.ontario.ca/en/release/60816/ontarios-booking-system-to-expand-to-individuals-aged-75-and-older-as-vaccine-rollout-accelerates
2021-03-22	News Release	Office of the Premier	https://news.ontario.ca/en/release/60848/ontario-supporting-hospitals-with-additional-funding-during-covid-19
2021-03-23	News Release	Office of the Premier	https://news.ontario.ca/en/release/60871/ontario-helping-people-get-their-covid-19-vaccination
2021-03-25	News Release	Health	https://news.ontario.ca/en/release/60890/timiskaming-public-health-region-moving-to-red-control-level-of-covid-19-response-framework
2021-03-26	News Release	Health	https://news.ontario.ca/en/release/60897/ontario-moving-two-regions-to-new-levels-in-the-covid-19-response-framework
2021-03-28	News Release	Health	https://news.ontario.ca/en/release/60907/ontario-expands-covid-19-vaccination-booking-to-individuals-aged-70-and-over-in-additional-regions
2021-03-29	News Release	Health	https://news.ontario.ca/en/release/60913/middlesex-london-public-health-region-moving-to-red-control-level-of-covid-19-response-framework
2021-03-31	News Release	Health	https://news.ontario.ca/en/release/60951/ontario-appoints-new-patient-ombudsman
2021-03-31	News Release	Office of the Premier	https://news.ontario.ca/en/release/60947/ontario-expands-domestic-vaccine-manufacturing-capacity-and-improves-pandemic-preparedness
2021-04-01	News Release	Health	https://news.ontario.ca/en/release/60976/ontario-expanding-pharmacy-and-primary-care-locations-for-covid-19-vaccinations
2021-04-01	News Release	Health	https://news.ontario.ca/en/release/60994/ontario-extends-covid-19-vaccination-booking-to-more-age-groups
2021-04-01	News Release	Office of the Premier	https://news.ontario.ca/en/release/60986/ontario-implements-provincewide-emergency-brake
2021-04-06	News Release	Office of the Premier	https://news.ontario.ca/en/release/61009/ontario-moving-to-phase-two-of-covid-19-vaccine-distribution-plan
2021-04-07	News Release	Office of the Premier	https://news.ontario.ca/en/release/61029/ontario-enacts-provincial-emergency-and-stay-at-home-order
2021-04-09	News Release	Health	https://news.ontario.ca/en/release/61094/ontario-supporting-health-system-response-during-third-wave-of-covid-19
2021-04-11	News Release	Health	https://news.ontario.ca/en/release/61096/ontario-expands-covid-19-vaccination-locations-to-more-pharmacies
2021-04-12	News Release	Office of the Premier	https://news.ontario.ca/en/release/61106/ontario-moves-schools-to-remote-learning-following-spring-break
2021-04-13	News Release	Office of the Premier	https://news.ontario.ca/en/release/61124/ontarios-covid-19-vaccination-strategy-targets-high-risk-neighbourhoods
2021-04-16	News Release	Office of the Premier	https://news.ontario.ca/en/release/61192/ontario-strengthens-enforcement-of-stay-at-home-order
2021-04-20	News Release	Health	https://news.ontario.ca/en/release/61212/select-ontario-pharmacies-offering-247-covid-19-vaccinations
2021-04-26	News Release	Health	https://news.ontario.ca/en/release/1000003/ontario-expanding-innovative-models-to-deliver-better-connected-care
2021-04-27	News Release	Health; Education	https://news.ontario.ca/en/release/1000011/ontario-expands-covid-19-vaccination-booking-to-individuals-45-and-over-in-hot-spot-communities
2021-04-27	News Release	Health	https://news.ontario.ca/en/release/1000014/ontario-introduces-legislation-to-strengthen-health-workforce-accountability-and-enhance-data-driven-covid-19-response
2021-04-28	News Release	Health	https://news.ontario.ca/en/release/1000020/ontario-maximizing-critical-care-capacity-to-support-hospitals
2021-04-29	News Release	Health; Solicitor General	https://news.ontario.ca/en/release/1000035/ontario-prepares-to-accelerate-rollout-as-vaccine-supply-increases
2021-05-02	News Release	Health	https://news.ontario.ca/en/release/1000052/ontario-expands-covid-19-vaccination-booking-for-more-people
2021-05-10	News Release	Health	https://news.ontario.ca/en/release/1000090/ontario-continues-to-expand-booking-eligibility-for-covid-19-vaccines-to-more-ontarians
2021-05-11	News Release	Health; Seniors and Accessibility	https://news.ontario.ca/en/release/1000095/ontario-expanding-access-to-dental-care-and-affordable-prescription-drugs-for-vulnerable-seniors
2021-05-12	News Release	Health	https://news.ontario.ca/en/release/1000114/over-50-per-cent-of-ontario-adults-receive-first-dose-of-covid-19-vaccine
2021-05-13	News Release	Office of the Premier	https://news.ontario.ca/en/release/1000124/ontario-extending-stay-at-home-order-until-june-2
2021-05-17	News Release	Health	https://news.ontario.ca/en/release/1000143/covid-19-vaccine-booking-expanding-to-ontarians-18-ahead-of-schedule
2021-05-20	News Release	Office of the Premier	https://news.ontario.ca/en/release/1000161/ontario-releases-three-step-roadmap-to-safely-reopen-the-province
2021-05-21	News Release	Health	https://news.ontario.ca/en/release/1000174/ontario-proceeding-with-second-dose-administration-of-astrazeneca
2021-05-21	News Release	Health	https://news.ontario.ca/en/release/1000185/covid-19-vaccine-booking-expanding-to-youth-12-ahead-of-schedule
2021-05-27	News Release	Health	https://news.ontario.ca/en/release/1000205/ontario-recognizing-outstanding-bravery-of-paramedics
2021-05-28	News Release	Office of the Premier	https://news.ontario.ca/en/release/1000217/ontario-accelerates-rollout-of-second-shots-targeting-a-two-dose-summer
2021-05-30	News Release	Health	https://news.ontario.ca/en/release/1000224/ontario-to-appoint-new-chief-medical-officer-of-health
2021-06-01	News Release	Health	https://news.ontario.ca/en/release/1000242/ontario-expanding-mental-health-services-for-children-and-youth
2021-06-02	News Release	Office of the Premier	https://news.ontario.ca/en/release/1000251/remote-learning-to-continue-across-ontario-for-the-remainder-of-school-year
2021-06-03	News Release	Health	https://news.ontario.ca/en/release/1000256/ontario-updating-astrazeneca-second-dose-guidance
2021-06-04	News Release	Health	https://news.ontario.ca/en/release/1000266/ontario-expanding-accelerated-second-dose-booking-to-more-ontarians-ahead-of-schedule
2021-06-07	News Release	Office of the Premier	https://news.ontario.ca/en/release/1000279/ontario-to-move-to-step-one-of-roadmap-to-reopen-on-june-11
2021-06-10	News Release	Health; Solicitor General	https://news.ontario.ca/en/release/1000317/ontario-further-accelerates-second-doses-in-delta-hot-spots
2021-06-11	News Release	Health; Children, Community and Social Services	https://news.ontario.ca/en/release/1000284/ontario-extending-temporary-wage-increase-for-personal-support-workers
2021-06-12	News Release	Health	https://news.ontario.ca/en/release/1000329/ontario-accelerates-second-doses-of-astrazeneca-covid-19-vaccine
2021-06-17	News Release	Health; Solicitor General	https://news.ontario.ca/en/release/1000367/accelerated-second-dose-eligibility-continues-ahead-of-schedule
2021-06-23	News Release	Health	https://news.ontario.ca/en/release/1000393/ontario-expanding-mental-health-and-addictions-supports-for-children-and-youth-in-northwestern-ontario
2021-06-23	News Release	Health	https://news.ontario.ca/en/release/1000392/ontario-launching-new-30-million-surgical-innovation-fund
2021-06-25	News Release	Health	https://news.ontario.ca/en/release/1000406/all-ontarians-aged-18-becoming-eligible-for-accelerated-second-doses
2021-07-08	News Release	Health; Solicitor General	https://news.ontario.ca/en/release/1000486/over-half-of-ontario-adults-now-vaccinated-with-second-dose
2021-07-26	News Release	Office of the Premier	https://news.ontario.ca/en/release/1000592/ontario-increasing-funding-for-hospital-care-in-ottawa
2021-07-28	News Release	Health	https://news.ontario.ca/en/release/1000613/ontario-ramping-up-efforts-to-reduce-surgical-wait-times
2021-08-17	News Release	Health	https://news.ontario.ca/en/release/1000750/ontario-makes-covid-19-vaccination-policies-mandatory-for-high-risk-settings
2021-08-23	News Release	Health; Children, Community and Social Services; Treasury Board Secretariat; Long-Term Care	https://news.ontario.ca/en/release/1000756/ontario-further-extending-temporary-wage-increase-for-personal-support-workers
2021-08-24	News Release	Health	https://news.ontario.ca/en/release/1000762/ontario-deploying-last-mile-strategy-to-further-increase-vaccination-rates
2021-09-01	News Release	Office of the Premier	https://news.ontario.ca/en/release/1000779/ontario-to-require-proof-of-vaccination-in-select-settings
2021-09-14	News Release	Health	https://news.ontario.ca/en/release/1000807/ontario-releasing-guidance-to-support-proof-of-vaccination-policy
2021-09-17	News Release	Health	https://news.ontario.ca/en/release/1000822/ontario-announces-eight-new-ontario-health-teams
2021-09-23	News Release	Health	https://news.ontario.ca/en/release/1000840/ontario-investing-in-health-care-infrastructure-upgrades-and-repairs
2021-09-24	News Release	Health	https://news.ontario.ca/en/release/1000864/ontario-cautiously-easing-capacity-limits-in-select-settings-where-proof-of-vaccination-is-required
2021-10-08	News Release	Health	https://news.ontario.ca/en/release/1000947/ontario-cautiously-lifting-capacity-limits-in-select-settings
2021-10-15	News Release	Office of the Premier	https://news.ontario.ca/en/release/1000979/enhanced-covid-19-vaccine-certificate-with-qr-code-and-verify-ontario-app-available-for-download-starting-october-15
2021-10-19	News Release	Health	https://news.ontario.ca/en/release/1000997/free-flu-shot-available-to-all-ontarians-in-november
2021-10-22	News Release	Office of the Premier	https://news.ontario.ca/en/release/1001027/ontario-releases-plan-to-safely-reopen-ontario-and-manage-covid-19-for-the-long-term
2021-10-28	News Release	Health; Children, Community and Social Services; Treasury Board Secretariat; Long-Term Care	https://news.ontario.ca/en/release/1001056/ontario-extending-temporary-wage-enhancement-for-personal-support-workers
2021-10-29	News Release	Health	https://news.ontario.ca/en/release/1001073/ontario-improving-access-to-hospice-and-compassionate-care
2021-10-29	News Release	Health	https://news.ontario.ca/en/release/1001080/apple-wallet-update-now-compatible-with-ontario-vaccine-certificate
2021-11-01	News Release	Health	https://news.ontario.ca/en/release/1001085/ontario-expanding-mental-health-and-eating-disorders-services-at-sickkids
2021-11-03	News Release	Health	https://news.ontario.ca/en/release/1001100/ontario-expanding-booster-eligibility-to-more-ontarians
2021-11-09	News Release	Health; Finance	https://news.ontario.ca/en/release/1001140/ontario-expanding-mental-health-and-addictions-supports-for-frontline-health-care-workers
2021-11-18	News Release	Health; Education	https://news.ontario.ca/en/release/1001184/ontario-enhancing-covid-19-winter-testing
2021-11-22	News Release	Health	https://news.ontario.ca/en/release/1001195/covid-19-vaccine-bookings-to-open-for-all-children-aged-five-to-11
2021-12-02	News Release	Health	https://news.ontario.ca/en/release/1001269/ontario-accelerating-booster-eligibility-to-adults-aged-50
2021-12-03	News Release	Health	https://news.ontario.ca/en/release/1001272/ontario-expanding-eating-disorder-services-for-children-and-youth
2021-12-07	News Release	Health	https://news.ontario.ca/en/release/1001293/ontario-extending-pause-on-lifting-capacity-limits-in-remaining-settings-where-proof-of-vaccination-is-required
2021-12-10	News Release	Health	https://news.ontario.ca/en/release/1001327/ontario-taking-action-to-protect-against-omicron-variant
2021-12-16	News Release	Health	https://news.ontario.ca/en/release/1001353/ontario-launching-holiday-pop-up-testing-blitz
2021-12-17	News Release	Office of the Premier	https://news.ontario.ca/en/release/1001366/ontario-further-strengthening-response-to-omicron
2021-12-22	News Release	Office of the Premier	https://news.ontario.ca/en/release/1001375/ontario-extending-call-to-arms-to-businesses-volunteers-and-retired-health-professionals
2021-12-23	News Release	Health	https://news.ontario.ca/en/release/1001377/ontario-opens-new-mass-vaccination-clinic-in-peel-region
2022-01-03	News Release	Office of the Premier	https://news.ontario.ca/en/release/1001394/ontario-temporarily-moving-to-modified-step-two-of-the-roadmap-to-reopen
2022-01-11	News Release	Health	https://news.ontario.ca/en/release/1001411/ontario-continues-to-add-hospital-beds-and-build-up-health-workforce
2022-01-20	News Release	Office of the Premier	https://news.ontario.ca/en/release/1001451/ontario-outlines-steps-to-cautiously-and-gradually-ease-public-health-measures
2022-02-09	News Release	Health	https://news.ontario.ca/en/release/1001575/ontario-expanding-access-to-free-rapid-tests-for-general-public
2022-02-10	News Release	Health	https://news.ontario.ca/en/release/1001580/ontario-announces-new-ontario-health-team-in-windsor-essex
2022-02-14	News Release	Office of the Premier	https://news.ontario.ca/en/release/1001600/ontario-moving-to-next-phase-of-reopening-on-february-17
2022-03-07	News Release	Health	https://news.ontario.ca/en/release/1001714/ontario-making-historic-investment-in-provincial-nursing-workforce
2022-04-11	News Release	Health	https://news.ontario.ca/en/release/1002011/ontario-expanding-access-to-covid-19-antivirals
2022-07-13	News Release	Health	https://news.ontario.ca/en/release/1002191/ontarians-aged-18-eligible-for-second-booster-shot
2022-07-21	News Release	Health	https://news.ontario.ca/en/release/1002197/covid-19-vaccine-bookings-to-open-for-children-aged-six-months-to-under-five-years
2022-08-18	News Release	Health; Long-Term Care	https://news.ontario.ca/en/release/1002246/ontario-introduces-a-plan-to-stay-open-health-system-stability-and-recovery
2022-08-31	News Release	Health	https://news.ontario.ca/en/release/1002264/children-aged-five-and-over-eligible-for-first-booster-shot
2022-09-12	News Release	Health	https://news.ontario.ca/en/release/1002277/ontarians-aged-18-eligible-for-bivalent-covid-19-booster-dose
2022-09-25	News Release	Health	https://news.ontario.ca/en/release/1002315/ontarians-18-eligible-for-bivalent-booster-starting-tomorrow
2022-10-13	News Release	Health	https://news.ontario.ca/en/release/1002384/all-ontarians-aged-12-eligible-for-bivalent-booster
2022-12-08	News Release	Health	https://news.ontario.ca/en/release/1002565/ontarians-can-now-visit-local-pharmacies-for-paxlovid-prescriptions
2022-12-15	News Release	Health	https://news.ontario.ca/en/release/1002597/all-ontarians-aged-5-eligible-for-bivalent-booster
